# Supplementary material for: Dual-functional photocatalysis for hydrogen evolution from industrial wastewaters
Source: Royal Society of Chemistry journal article supplement (doi:10.1039/c7cp00250e), 2017-01-01
Supplement: c7cp00250e1.pdf [file c7cp00250e1.pdf]

# **Supporting Information for**

## **Dual-functional photocatalysis for hydrogen evolution from**

### **industrial wastewaters**

Zhaoyong Lin, Lihua Li, Lili Yu, Weijia Li and Guowei Yang

*State Key Laboratory of Optoelectronic Materials and Technologies, Nanotechnology  
Research Center, School of Materials Science & Engineering, Sun Yat-sen University,  
Guangzhou 510275, Guangdong, P. R. China*

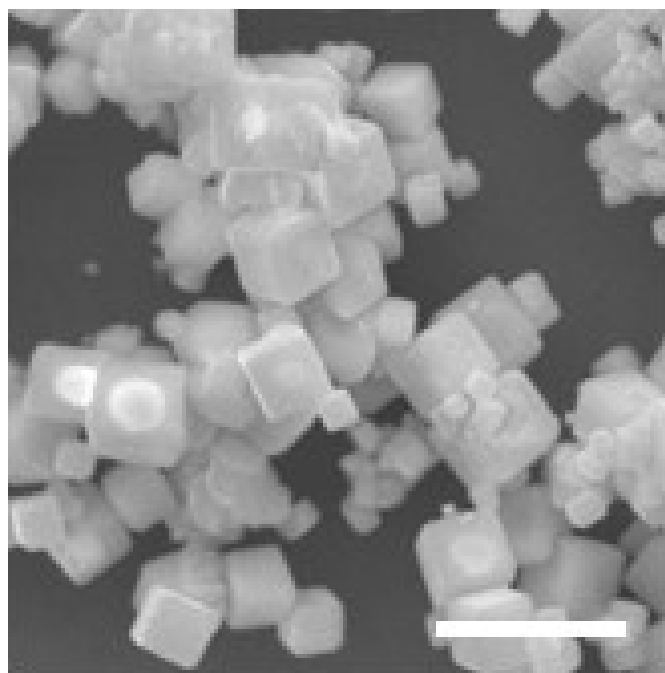

**Fig. S1.** SEM image of Cu<sub>2</sub>O cube in low magnitude. The scale bar represents 1  $\mu\text{m}$ .

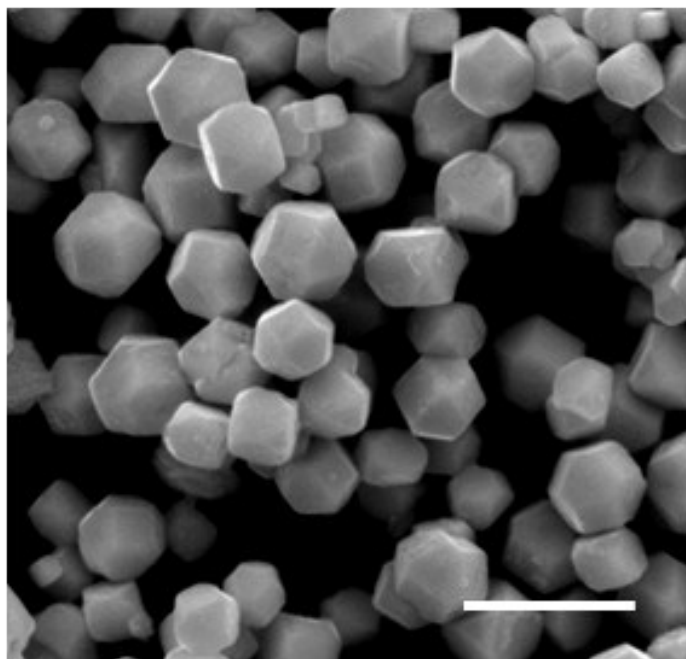

**Fig. S2.** SEM image of Cu<sub>2</sub>O truncated cube in low magnification. The scale bar represents 1  $\mu\text{m}$ .

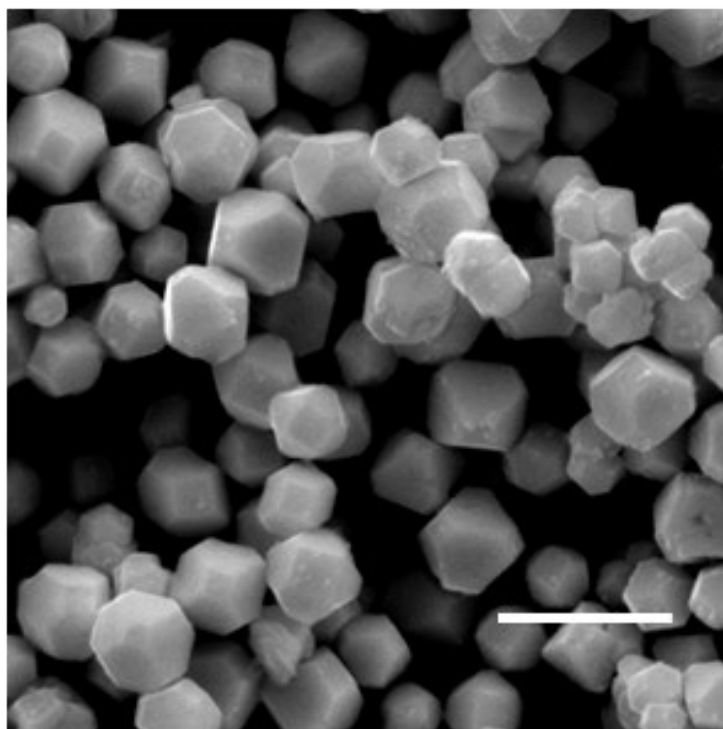

**Fig. S3.** SEM image of Cu<sub>2</sub>O cubooctahedron in low magnification. The scale bar represents 1  $\mu\text{m}$ .

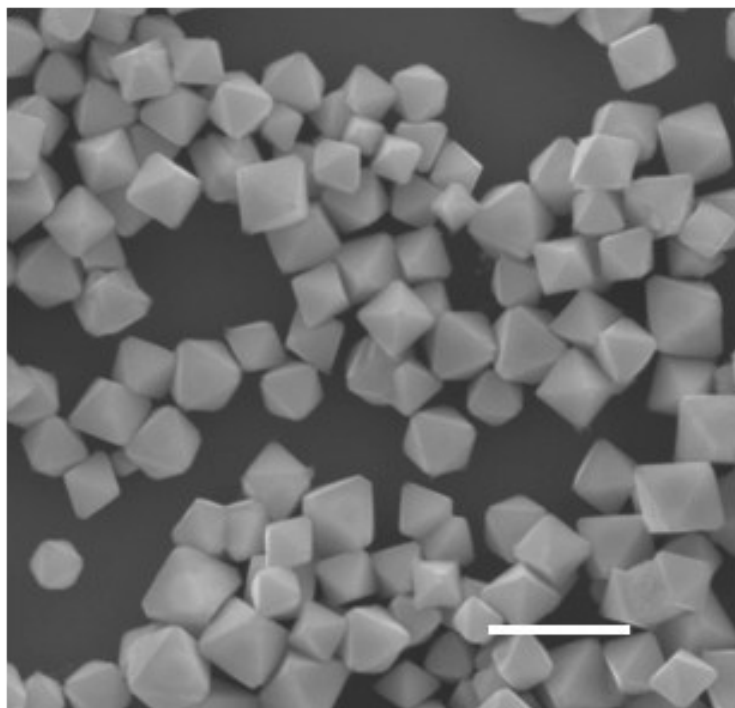

**Fig. S4.** SEM image of Cu<sub>2</sub>O truncated octahedron in low magnitude. The scale bar represents 1  $\mu\text{m}$ .

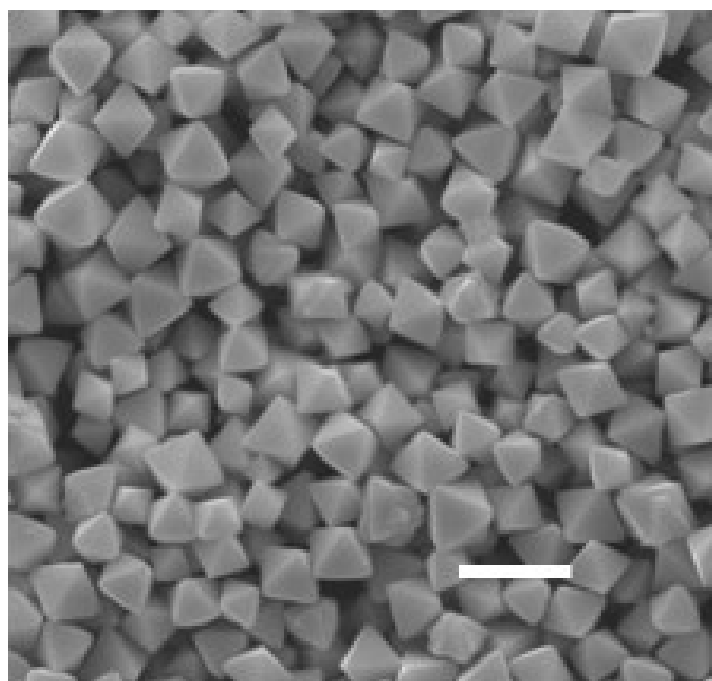

**Fig. S5.** SEM image of Cu<sub>2</sub>O octahedron in low magnitude. The scale bar represents 1  $\mu\text{m}$ .

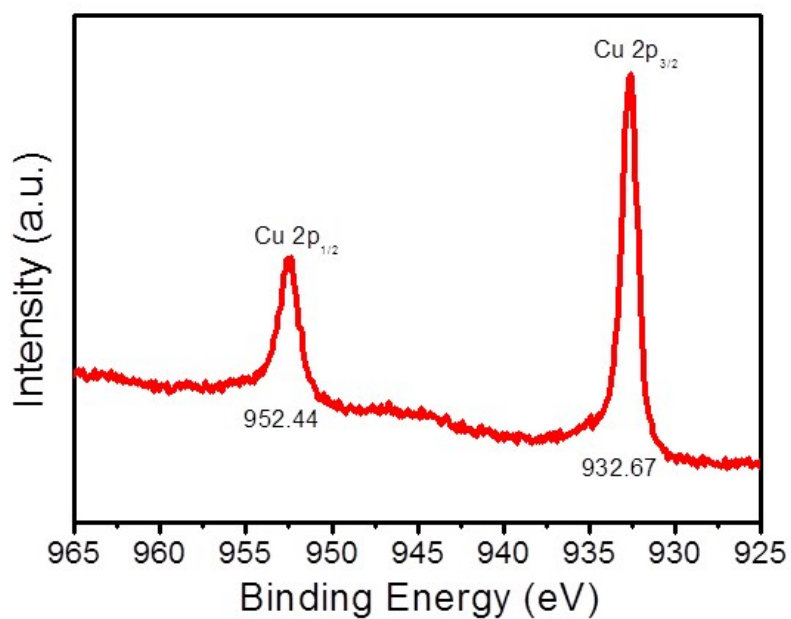

**Fig. S6.** Cu 2p XPS pattern of Cu<sub>2</sub>O.

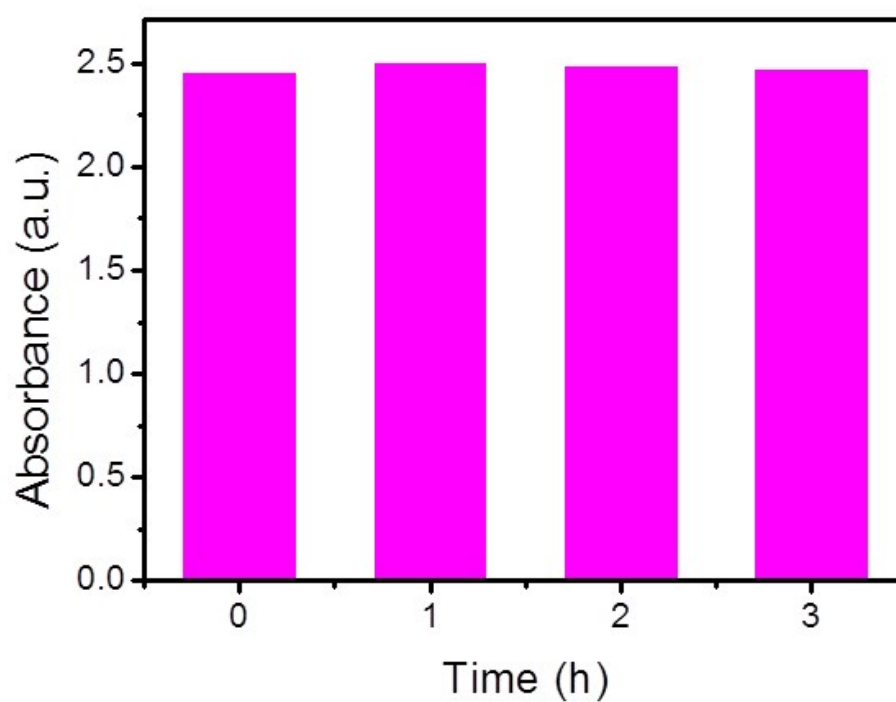

**Fig. S7.** The absorbance variation of the RhB solution without photocatalyst (characteristic wavelength is set as 554 nm).

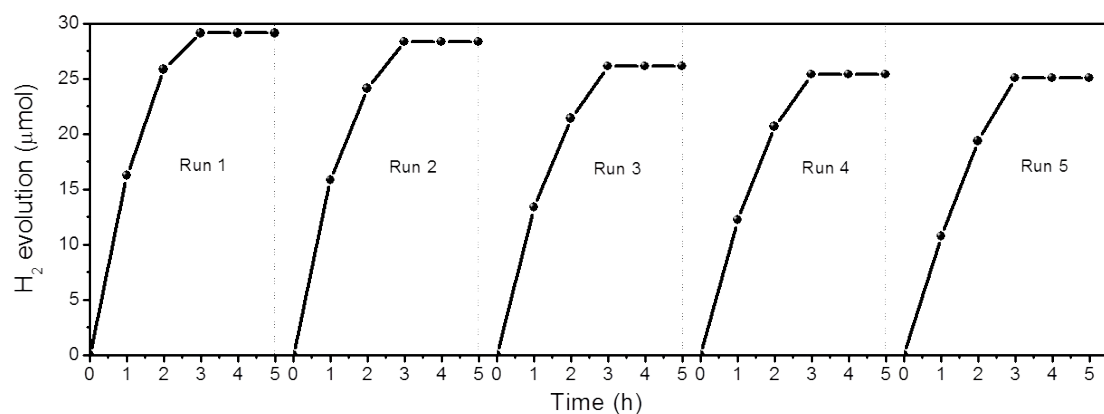

**Fig. S8.** Cycling tests of the photocatalyst under AM 1.5 irradiation.

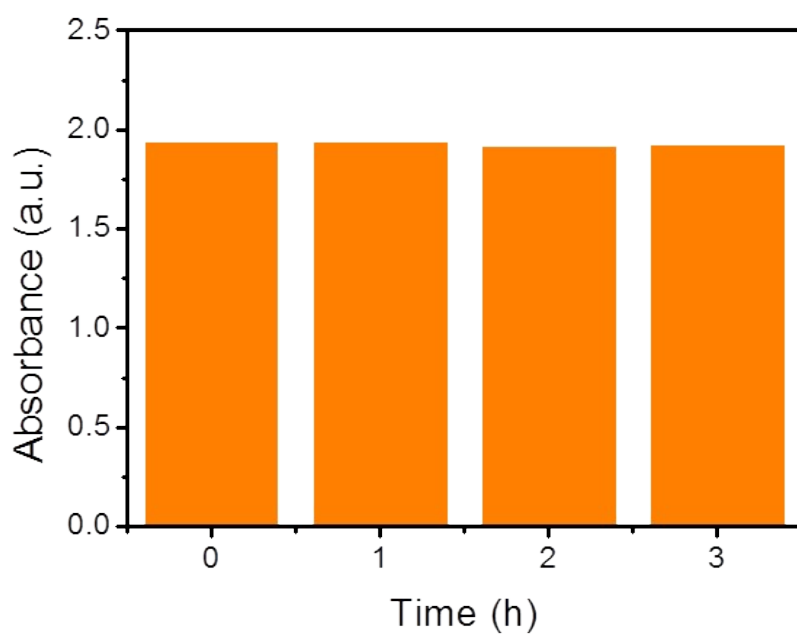

**Fig. S9.** The absorbance variation of the MO solution without photocatalyst (characteristic wavelength is set as 464 nm).

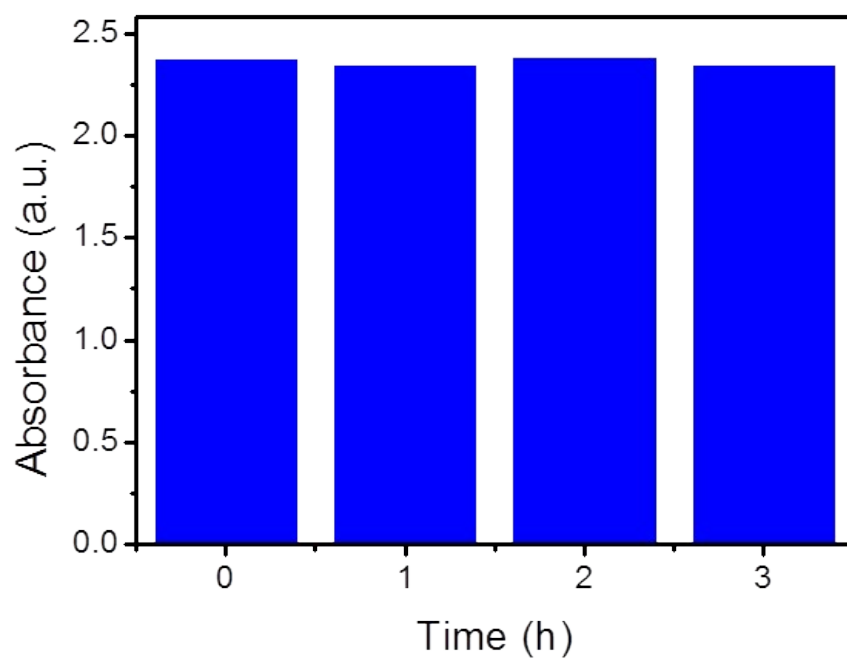

**Fig. S10.** The absorbance variation of the MB solution without photocatalyst (characteristic wavelength is set as 664 nm).
